# Supplementary material for: Characterizing Agronomic and Shoot Morphological Diversity across 263 Wild Emmer Wheat Accessions
Source: MDPI journal article supplement (doi:10.3390/agriculture13040759), 2023-03-25
Supplement: s1 [file s1]

# 1 Supplementary Table

2 Supplementary Table S1: Descriptive data including mean, average coefficients of variation (ACV%)  
3 and range for 19 above ground traits in three environments (E1, E2, and E3) along with their average  
4 value.

| Traits                  | Environment    | Mean          | ACV%         | Minimum       | Maximum       | Range         |
|-------------------------|----------------|---------------|--------------|---------------|---------------|---------------|
| Heading time (days)     | E1             | 184.69        | 16.97        | 53.80         | 242.33        | 188.53        |
| HT                      | E2             | 166.72        | 36.00        | 59.75         | 284.00        | 224.25        |
|                         | E3             | 108.71        | 5.36         | 82.00         | 128.00        | 46.00         |
|                         | <b>Average</b> | <b>164.66</b> | <b>21.21</b> | <b>64.00</b>  | <b>262.33</b> | <b>198.33</b> |
| Flowering time (days)   | E1             | 190.85        | 15.65        | 57.40         | 245.00        | 187.60        |
| FT                      | E2             | 171.56        | 35.22        | 63.75         | 289.00        | 225.25        |
|                         | E3             | 114.62        | 4.26         | 88.67         | 132.00        | 43.33         |
|                         | <b>Average</b> | <b>170.39</b> | <b>20.08</b> | <b>68.00</b>  | <b>268.00</b> | <b>200.00</b> |
| Maturity time (days)    | E1             | 246.06        | 7.28         | 140.00        | 275.00        | 135.00        |
| MT                      | E2             | 269.20        | 18.97        | 110.50        | 322.00        | 211.50        |
|                         | E3             | 143.11        | 2.63         | 130.00        | 155.00        | 25.00         |
|                         | <b>Average</b> | <b>231.09</b> | <b>11.62</b> | <b>143.58</b> | <b>300.67</b> | <b>157.09</b> |
| Plant height (cm)       | E1             | 128.51        | 18.41        | 47.00         | 186.00        | 139.00        |
| PH                      | E2             | 119.81        | 19.38        | 63.00         | 178.00        | 115.00        |
|                         | E3             | 119.95        | 10.87        | 82.00         | 148.00        | 66.00         |
|                         | <b>Average</b> | <b>123.48</b> | <b>14.00</b> | <b>65.00</b>  | <b>159.67</b> | <b>94.67</b>  |
| Total tiller number     | E1             | 5.92          | 29.49        | 2.33          | 14.00         | 11.67         |
| TTN                     | E2             | 8.22          | 32.61        | 3.00          | 20.00         | 17.00         |
|                         | E3             | 6.75          | 17.26        | 4.00          | 11.00         | 7.00          |
|                         | <b>Average</b> | <b>6.62</b>   | <b>22.47</b> | <b>3.50</b>   | <b>12.29</b>  | <b>8.79</b>   |
| Effective tiller number | E1             | 3.40          | 34.90        | 1.25          | 8.00          | 6.75          |
| ETN                     | E2             | 4.69          | 41.04        | 1.00          | 14.00         | 13.00         |
|                         | E3             | 4.62          | 24.26        | 3.00          | 9.00          | 6.00          |
|                         | <b>Average</b> | <b>3.94</b>   | <b>26.76</b> | <b>1.33</b>   | <b>8.25</b>   | <b>6.92</b>   |

|                                     |                |              |              |              |              |              |
|-------------------------------------|----------------|--------------|--------------|--------------|--------------|--------------|
| Spike length (cm)                   | E1             | 6.59         | 15.88        | 4.00         | 9.50         | 5.50         |
| SpL                                 | E2             | 7.50         | 17.44        | 4.50         | 11.75        | 7.25         |
|                                     | E3             | 9.64         | 11.11        | 6.00         | 12.50        | 6.50         |
|                                     | <b>Average</b> | <b>7.40</b>  | <b>14.17</b> | <b>4.00</b>  | <b>9.72</b>  | <b>5.72</b>  |
| Peduncle length (cm)                | E1             | 43.41        | 28.59        | 11.00        | 76.50        | 65.50        |
| PL                                  | E2             | 52.28        | 23.16        | 23.00        | 81.50        | 58.50        |
|                                     | E3             | 60.49        | 16.31        | 35.00        | 81.00        | 46.00        |
|                                     | <b>Average</b> | <b>48.69</b> | <b>21.29</b> | <b>11.00</b> | <b>70.38</b> | <b>59.38</b> |
| First leaf area (cm <sup>2</sup> )  | E1             | 24.17        | 44.75        | 2.36         | 58.16        | 55.80        |
| FLA                                 | E2             | 29.62        | 46.17        | 4.35         | 76.73        | 72.38        |
|                                     | E3             | 20.41        | 26.99        | 6.75         | 37.48        | 30.73        |
|                                     | <b>Average</b> | <b>24.42</b> | <b>34.56</b> | <b>4.20</b>  | <b>47.84</b> | <b>43.64</b> |
| Second leaf area (cm <sup>2</sup> ) | E1             | 32.60        | 34.73        | 4.37         | 63.21        | 58.84        |
| SLA                                 | E2             | 34.80        | 37.16        | 5.97         | 84.27        | 78.30        |
|                                     | E3             | 25.09        | 19.90        | 13.35        | 41.63        | 28.28        |
|                                     | <b>Average</b> | <b>31.12</b> | <b>27.36</b> | <b>6.83</b>  | <b>57.72</b> | <b>50.89</b> |
| Shoot angle (°)                     | E1             | 51.19        | 35.16        | 5.00         | 86.37        | 81.37        |
| Sang                                | E2             | 57.60        | 25.59        | 8.88         | 86.53        | 77.65        |
|                                     | E3             | 62.18        | 18.85        | 20.00        | 90.00        | 70.00        |
|                                     | <b>Average</b> | <b>54.34</b> | <b>26.73</b> | <b>6.11</b>  | <b>81.14</b> | <b>75.03</b> |
| Biomass/plant (g)                   | E1             | 9.03         | 36.13        | 2.52         | 25.52        | 23.00        |
| BPP                                 | E2             | 14.11        | 49.71        | 1.86         | 55.46        | 53.60        |
|                                     | E3             | 6.41         | 26.32        | 1.85         | 11.59        | 9.74         |
|                                     | <b>Average</b> | <b>9.71</b>  | <b>34.56</b> | <b>2.85</b>  | <b>34.13</b> | <b>31.28</b> |
| Yield/plant (g)                     | E1             | 1.05         | 44.52        | 0.11         | 2.47         | 2.36         |
| YPP                                 | E2             | 1.58         | 48.62        | 0.06         | 4.34         | 4.28         |
|                                     | E3             | 0.66         | 79.62        | 0.11         | 4.30         | 4.19         |
|                                     | <b>Average</b> | <b>1.10</b>  | <b>38.19</b> | <b>0.11</b>  | <b>3.05</b>  | <b>2.94</b>  |
| Thousand kernel weight (g)          | E1             | 26.59        | 22.76        | 6.63         | 43.18        | 36.55        |
| TKW                                 | E2             | 30.81        | 25.58        | 8.15         | 46.90        | 38.75        |

|                              |                |              |              |             |              |              |
|------------------------------|----------------|--------------|--------------|-------------|--------------|--------------|
|                              | E3             | 24.44        | 20.25        | 9.80        | 47.60        | 37.80        |
|                              | <b>Average</b> | <b>27.18</b> | <b>17.94</b> | <b>7.24</b> | <b>39.58</b> | <b>32.34</b> |
| Seed length (mm)             | E1             | 8.84         | 6.77         | 6.24        | 10.50        | 4.26         |
| SL                           | E2             | 9.04         | 7.81         | 5.50        | 10.77        | 5.27         |
|                              | E3             | 8.57         | 6.34         | 6.07        | 9.63         | 3.56         |
|                              | <b>Average</b> | <b>8.83</b>  | <b>5.86</b>  | <b>6.08</b> | <b>10.08</b> | <b>4.00</b>  |
| Seed width (mm)              | E1             | 2.54         | 9.58         | 1.67        | 3.32         | 1.65         |
| SW                           | E2             | 2.64         | 10.29        | 1.69        | 3.47         | 1.78         |
|                              | E3             | 2.44         | 8.58         | 1.69        | 3.50         | 1.81         |
|                              | <b>Average</b> | <b>2.54</b>  | <b>8.18</b>  | <b>1.68</b> | <b>3.39</b>  | <b>1.71</b>  |
| Seed thickness (mm)          | E1             | 2.39         | 11.70        | 1.31        | 3.14         | 1.83         |
| ST                           | E2             | 2.37         | 12.00        | 1.31        | 3.08         | 1.77         |
|                              | E3             | 2.16         | 9.71         | 1.55        | 3.21         | 1.66         |
|                              | <b>Average</b> | <b>2.33</b>  | <b>8.75</b>  | <b>1.41</b> | <b>3.08</b>  | <b>1.67</b>  |
| Seed area (mm <sup>2</sup> ) | E1             | 14.85        | 13.23        | 8.50        | 20.53        | 12.03        |
| SA                           | E2             | 15.81        | 13.64        | 9.00        | 20.20        | 11.20        |
|                              | E3             | 14.13        | 12.19        | 8.10        | 18.20        | 10.10        |
|                              | <b>Average</b> | <b>14.92</b> | <b>10.85</b> | <b>8.79</b> | <b>18.78</b> | <b>9.99</b>  |
| Threshability                | E1             | 2.88         | 19.59        | 1.00        | 4.00         | 3.00         |
| T                            | E2             | 3.35         | 17.03        | 1.00        | 4.00         | 3.00         |
|                              | E3             | 3.01         | 14.78        | 1.00        | 4.00         | 3.00         |
|                              | <b>Average</b> | <b>3.02</b>  | <b>17.10</b> | <b>1.00</b> | <b>4.00</b>  | <b>3.00</b>  |

5

6 Supplementary Table S2: Analysis of variance (ANOVA) table for above ground traits in three  
7 environments of 263 wild emmer accessions.

|  |                    | Sources of variation |                 |       |       |
|--|--------------------|----------------------|-----------------|-------|-------|
|  |                    | Genotype (G)         | Environment (E) | G X E | Error |
|  | Degrees of freedom | 262                  | 2               | 434   | 1405  |

|                               |             |            |               |            |       |
|-------------------------------|-------------|------------|---------------|------------|-------|
| <b>Mean<br/>of<br/>square</b> | <b>HT</b>   | 6098.01*** | 689326.09***  | 2449.07*** | 26.28 |
|                               | <b>FT</b>   | 5827.51*** | 692428.12***  | 2520.67*** | 18.87 |
|                               | <b>MT</b>   | 3200.17*** | 1792208.68*** | 2223.76*** | 54.74 |
|                               | <b>PH</b>   | 1807.81*** | 24483.21***   | 738.69***  | 70.08 |
|                               | <b>TTN</b>  | 12.06***   | 717.03***     | 6.78***    | 1.82  |
|                               | <b>ETN</b>  | 5.66***    | 316.87***     | 4.23***    | 0.71  |
|                               | <b>SpL</b>  | 5.04***    | 1151.06***    | 2.20***    | 0.59  |
|                               | <b>PL</b>   | 484.58***  | 33431.93***   | 262.11***  | 43.76 |
|                               | <b>FLA</b>  | 410.75***  | 10492.76***   | 211.03***  | 32.31 |
|                               | <b>SLA</b>  | 416.36***  | 13773.13***   | 191.66***  | 27.66 |
|                               | <b>SAng</b> | 995.59***  | 10587.39***   | 333.04***  | 42.99 |
|                               | <b>BPP</b>  | 54.63***   | 6382.37***    | 35.70***   | 1.11  |
|                               | <b>YPP</b>  | 1.06***    | 91.49***      | 0.81***    | 0.03  |
|                               | <b>TKW</b>  | 138.65***  | 5333.06***    | 79.57***   | 8.27  |
|                               | <b>SL</b>   | 2.06***    | 27.80***      | 0.45***    | 0.30  |
|                               | <b>SW</b>   | 0.28***    | 4.72***       | 0.08***    | 0.05  |
|                               | <b>ST</b>   | 0.25***    | 9.55***       | 0.12***    | 0.06  |
|                               | <b>SA</b>   | 15.97***   | 372.19***     | 5.84***    | 1.33  |
|                               | <b>T</b>    | 1.65***    | 32.30***      | 0.22***    | 0.15  |

8 \*\*\* p < 0.001

10 Supplementary Table S3: Pearson's correlation between different shoot traits in E1.

|             | <b>FT</b>  | <b>MT</b>  | <b>PH</b> | <b>TTN</b> | <b>ETN</b> | <b>SpL</b>  | <b>PL</b>   | <b>FLA</b>  | <b>SLa</b>  | <b>SAng</b>  | <b>BPP</b> | <b>YPP</b>  | <b>TKW</b>  | <b>SL</b>   | <b>SW</b>   | <b>ST</b>   | <b>SA</b>   | <b>T</b>    |
|-------------|------------|------------|-----------|------------|------------|-------------|-------------|-------------|-------------|--------------|------------|-------------|-------------|-------------|-------------|-------------|-------------|-------------|
| <b>HT</b>   | 0.99<br>** | 0.81<br>** | -0.03     | 0.03       | -0.04      | -0.31<br>** | -0.31<br>** | -0.55<br>** | -0.40<br>** | -0.30<br>**  | 0.01       | -0.28<br>** | -0.43<br>** | -0.26<br>** | -0.43<br>** | -0.34<br>** | -0.37<br>** | 0.15<br>*   |
| <b>FT</b>   |            | 0.81<br>** | -0.02     | 0.04       | -0.06      | -0.31<br>** | -0.29<br>** | -0.53<br>** | -0.39<br>** | -0.306<br>** | -0.03      | -0.30<br>** | -0.44<br>** | -0.25<br>** | -0.43<br>** | -0.34<br>** | -0.36<br>** | 0.16<br>**  |
| <b>MT</b>   |            |            | -0.11     | 0.08       | -0.05      | -0.28<br>** | -0.31<br>** | -0.44<br>** | -0.37<br>** | -0.22<br>**  | -0.03      | -0.31<br>** | -0.41<br>** | -0.26<br>** | -0.39<br>** | -0.33<br>** | -0.36<br>** | 0.14<br>*   |
| <b>PH</b>   |            |            |           | 0.03       | -0.09      | 0.48<br>**  | 0.72<br>**  | 0.35<br>**  | 0.58<br>**  | 0.23<br>**   | 0.51<br>** | 0.34<br>**  | 0.24<br>**  | 0.29<br>**  | 0.23<br>**  | 0.19<br>**  | 0.35<br>**  | 0.13<br>*   |
| <b>TTN</b>  |            |            |           |            | 0.70<br>** | -0.03<br>*  | 0.13<br>*   | -0.11       | -0.12       | 0.21<br>**   | 0.50<br>** | 0.35<br>**  | -0.03       | -0.07<br>*  | -0.14<br>*  | -0.03       | -0.13<br>*  | 0.09        |
| <b>ETN</b>  |            |            |           |            |            | -0.13<br>*  | 0.13<br>*   | -0.23<br>** | -0.28<br>** | 0.17<br>**   | 0.46<br>** | 0.39<br>**  | -0.05       | -0.18<br>** | -0.19<br>** | -0.11       | -0.24<br>** | 0.02        |
| <b>SpL</b>  |            |            |           |            |            |             | 0.40<br>**  | 0.54<br>**  | 0.66<br>**  | 0.07<br>**   | 0.37<br>** | 0.36<br>**  | 0.35<br>**  | 0.35<br>**  | 0.28<br>**  | 0.15<br>*   | 0.37<br>**  | 0.07        |
| <b>PL</b>   |            |            |           |            |            |             |             | 0.41<br>**  | 0.46<br>**  | 0.28<br>**   | 0.47<br>** | 0.43<br>**  | 0.22<br>**  | 0.26<br>**  | 0.18<br>**  | 0.1<br>**   | 0.26<br>**  | 0.15<br>*   |
| <b>FLA</b>  |            |            |           |            |            |             |             |             | 0.79<br>**  | 0.24<br>**   | 0.13<br>*  | 0.30<br>**  | 0.46<br>**  | 0.44<br>**  | 0.46<br>**  | 0.36<br>**  | 0.54<br>**  | -0.07       |
| <b>SLA</b>  |            |            |           |            |            |             |             |             |             | 0.22<br>**   | 0.26<br>** | 0.35<br>**  | 0.46<br>**  | 0.49<br>**  | 0.43<br>**  | 0.35<br>**  | 0.57<br>**  | 0.03        |
| <b>SAng</b> |            |            |           |            |            |             |             |             |             |              | 0.25<br>** | 0.26<br>**  | 0.1<br>*    | 0.01<br>*   | 0.14<br>*   | 0.20<br>**  | 0.09        | 0.02        |
| <b>BPP</b>  |            |            |           |            |            |             |             |             |             |              |            | 0.68<br>**  | 0.16<br>**  | 0.03        | 0.07        | 0.04        | 0.08        | 0.05        |
| <b>YPP</b>  |            |            |           |            |            |             |             |             |             |              |            |             | 0.46<br>**  | 0.06        | 0.32<br>**  | 0.24<br>**  | 0.25<br>**  | -0.15<br>*  |
| <b>TKW</b>  |            |            |           |            |            |             |             |             |             |              |            |             |             | 0.51<br>**  | 0.83<br>**  | 0.54<br>**  | 0.83<br>**  | -0.30<br>** |
| <b>SL</b>   |            |            |           |            |            |             |             |             |             |              |            |             |             |             | 0.32<br>**  | 0.18<br>**  | 0.75<br>**  | 0.11        |
| <b>SW</b>   |            |            |           |            |            |             |             |             |             |              |            |             |             |             |             | 0.63<br>**  | 0.83<br>**  | -0.40<br>** |
| <b>ST</b>   |            |            |           |            |            |             |             |             |             |              |            |             |             |             |             |             | 0.50<br>**  | -0.25<br>** |
| <b>SA</b>   |            |            |           |            |            |             |             |             |             |              |            |             |             |             |             |             |             | -0.22<br>** |

11 \*\* Correlation is significant at 0.01 level; \* Correlation is significant at 0.05 level.

12 Supplementary Table S3 (Contd.): Pearson's correlation between different shoot traits in E2.

|             | FT         | MT         | PH         | TTN        | ETN        | SpL         | PL         | FLA         | SLa         | SAng       | BPP        | YPP        | TKW        | SL         | SW          | ST          | SA         | T           |
|-------------|------------|------------|------------|------------|------------|-------------|------------|-------------|-------------|------------|------------|------------|------------|------------|-------------|-------------|------------|-------------|
| <b>HT</b>   | 0.99<br>** | 0.72<br>** | 0.25<br>** | 0.20<br>** | 0.15<br>*  | -0.19<br>** | -0.04      | -0.26<br>** | -0.29<br>** | -0.06      | 0.42<br>** | -0.01      | -0.05      | 0.15<br>*  | -0.21<br>** | -0.20<br>** | -0.1       | 0.28<br>**  |
| <b>FT</b>   |            | 0.72<br>** | 0.25<br>** | 0.20<br>** | 0.14<br>*  | -0.18<br>** | -0.05      | -0.26<br>** | -0.29<br>** | -0.05      | 0.41<br>** | -0.01      | -0.06      | 0.14<br>*  | -0.21<br>** | -0.20<br>** | -0.1       | 0.28<br>**  |
| <b>MT</b>   |            |            | 0.39<br>** | 0.14<br>*  | 0.02       | -0.06       | 0.06       | 0.01        | -0.05       | 0.04       | 0.47<br>** | 0.17<br>*  | 0.14<br>*  | 0.28<br>** | 0.01        | -0.01       | 0.08       | 0.42<br>**  |
| <b>PH</b>   |            |            |            | -0.09      | -0.01      | 0.38<br>**  | 0.63<br>** | 0.20<br>**  | 0.38<br>**  | 0.11       | 0.40<br>** | 0.32<br>** | 0.42<br>** | 0.31<br>** | 0.29<br>**  | 0.25<br>**  | 0.38<br>** | 0.18<br>**  |
| <b>TTN</b>  |            |            |            |            | 0.81<br>** | -0.04       | -0.11      | -0.18<br>** | -0.27<br>** | 0.01       | 0.38<br>** | 0.31<br>** | -0.1       | -0.04      | -0.05       | -0.03       | -0.11      | -0.03       |
| <b>ETN</b>  |            |            |            |            |            | -0.04       | 0.04       | -0.21<br>** | -0.22<br>** | -0.03      | 0.33<br>** | 0.38<br>** | 0.01       | -0.05      | -0.07       | -0.01       | -0.09      | -0.02       |
| <b>SpL</b>  |            |            |            |            |            |             | 0.44<br>** | 0.58<br>**  | 0.68<br>**  | 0.15<br>*  | 0.12       | 0.20<br>** | 0.22<br>** | 0.19<br>** | 0.29<br>**  | 0.22<br>**  | 0.35<br>** | 0.13        |
| <b>PL</b>   |            |            |            |            |            |             |            | 0.32<br>**  | 0.39<br>**  | 0.18<br>** | 0.12       | 0.20<br>** | 0.21<br>** | 0.22<br>** | 0.18<br>**  | 0.15<br>*   | 0.25<br>** | 0.13        |
| <b>FLA</b>  |            |            |            |            |            |             |            |             | 0.84<br>**  | 0.11       | -0.04      | 0.16<br>*  | 0.32<br>** | 0.35<br>** | 0.43<br>**  | 0.37<br>**  | 0.50<br>** | 0.08        |
| <b>SLA</b>  |            |            |            |            |            |             |            |             |             | 0.15<br>*  | 0.01       | 0.25<br>** | 0.41<br>** | 0.32<br>** | 0.44<br>**  | 0.38<br>**  | 0.53<br>** | 0.1         |
| <b>SAng</b> |            |            |            |            |            |             |            |             |             |            | -0.06      | -0.01      | 0.07       | -0.08      | 0.14<br>*   | 0.03        | 0.1        | -0.11       |
| <b>BPP</b>  |            |            |            |            |            |             |            |             |             |            |            | 0.46<br>** | 0.08       | 0.20<br>** | 0.04        | 0.02        | 0.12       | 0.30<br>**  |
| <b>YPP</b>  |            |            |            |            |            |             |            |             |             |            |            |            | 0.50<br>** | 0.23<br>** | 0.33<br>**  | 0.34<br>**  | 0.32<br>** | 0.08        |
| <b>TKW</b>  |            |            |            |            |            |             |            |             |             |            |            |            |            | 0.52<br>** | 0.77<br>**  | 0.68<br>**  | 0.82<br>** | -0.01       |
| <b>SL</b>   |            |            |            |            |            |             |            |             |             |            |            |            |            |            | 0.37<br>**  | 0.25<br>**  | 0.74<br>** | 0.46<br>**  |
| <b>SW</b>   |            |            |            |            |            |             |            |             |             |            |            |            |            |            |             | 0.80<br>**  | 0.81<br>** | -0.18<br>** |
| <b>ST</b>   |            |            |            |            |            |             |            |             |             |            |            |            |            |            |             |             | 0.64<br>** | -0.14<br>*  |
| <b>SA</b>   |            |            |            |            |            |             |            |             |             |            |            |            |            |            |             |             |            | 0.13        |

13 \*\* Correlation is significant at 0.01 level; \* Correlation is significant at 0.05 level.

14 Supplementary Table S3 (Cond.): Pearson's correlation between different shoot traits in E3.

|             | FT         | MT         | PH          | TTN         | ETN         | SpL         | PL          | FLA         | SLa        | SAng        | BPP         | YPP         | TKW         | SL          | SW          | ST          | SA          | T           |
|-------------|------------|------------|-------------|-------------|-------------|-------------|-------------|-------------|------------|-------------|-------------|-------------|-------------|-------------|-------------|-------------|-------------|-------------|
| <b>HT</b>   | 0.80<br>** | 0.59<br>** | -0.36<br>** | 0.14<br>*   | 0.09        | -0.36<br>** | -0.48<br>** | -0.28<br>** | 0.04       | -0.11       | -0.32<br>** | -0.28<br>** | -0.51<br>** | -0.31<br>** | -0.54<br>** | -0.43<br>** | -0.55<br>** | 0.23<br>**  |
| <b>FT</b>   |            | 0.56<br>** | -0.19<br>** | 0.11        | 0.12        | -0.36<br>** | -0.32<br>** | -0.33<br>** | 0.04       | -0.04       | -0.23<br>** | -0.28<br>** | -0.35<br>** | -0.11<br>** | -0.42<br>** | -0.31<br>** | -0.35<br>** | 0.17<br>*   |
| <b>MT</b>   |            |            | -0.09       | 0.04        | -0.01       | -0.14<br>*  | -0.24<br>** | -0.18<br>** | 0.08       | -0.03       | -0.08       | -0.12       | -0.35<br>** | -0.32<br>** | -0.33<br>** | -0.24<br>** | -0.40<br>** | 0.06        |
| <b>PH</b>   |            |            |             | -0.26<br>** | -0.22<br>** | 0.48<br>**  | 0.86<br>**  | 0.26<br>**  | 0.25<br>** | 0.16<br>*   | 0.50<br>**  | 0.03        | 0.34<br>**  | 0.40<br>**  | 0.39<br>**  | 0.31<br>**  | 0.49<br>**  | -0.1        |
| <b>TTN</b>  |            |            |             |             | 0.73<br>**  | -0.19<br>** | -0.26<br>** | -0.11<br>** | -0.15<br>* | -0.18<br>** | -0.13       | -0.07       | -0.20<br>** | -0.15<br>*  | -0.17<br>*  | -0.13<br>** | -0.19<br>** | 0.07        |
| <b>ETN</b>  |            |            |             |             |             | -0.13<br>*  | -0.23<br>** | -0.11       | -0.08      | -0.16<br>*  | 0.03        | 0.06        | -0.06       | -0.07       | -0.06       | -0.06       | -0.09       | 0.01        |
| <b>SpL</b>  |            |            |             |             |             |             | 0.46<br>**  | 0.50<br>**  | 0.28<br>** | 0.02        | 0.49<br>**  | 0.15<br>*   | 0.24<br>**  | 0.15<br>*   | 0.35<br>**  | 0.23<br>**  | 0.32<br>**  | -0.11       |
| <b>PL</b>   |            |            |             |             |             |             |             | 0.33<br>**  | 0.29<br>** | 0.07        | 0.46<br>**  | 0.02        | 0.34<br>**  | 0.43<br>**  | 0.36<br>**  | 0.28<br>**  | 0.49<br>**  | -0.06       |
| <b>FLA</b>  |            |            |             |             |             |             |             |             | 0.55<br>** | -0.05       | 0.40<br>**  | 0.17<br>*   | 0.24<br>**  | 0.07<br>**  | 0.38<br>**  | 0.34<br>**  | 0.30<br>**  | -0.12       |
| <b>SLA</b>  |            |            |             |             |             |             |             |             |            | -0.03       | 0.31<br>**  | 0.12        | 0.16<br>*   | 0.1         | 0.21<br>**  | 0.20<br>**  | 0.21<br>**  | -0.06       |
| <b>SAng</b> |            |            |             |             |             |             |             |             |            |             | 0.07        | 0.24<br>**  | 0.13<br>*   | -0.15<br>*  | 0.20<br>**  | 0.21<br>**  | 0.06        | -0.29<br>** |
| <b>BPP</b>  |            |            |             |             |             |             |             |             |            |             |             | 0.48<br>**  | 0.38<br>**  | 0.13<br>**  | 0.48<br>**  | 0.41<br>**  | 0.40<br>**  | -0.34<br>** |
| <b>YPP</b>  |            |            |             |             |             |             |             |             |            |             |             |             | 0.50<br>**  | -0.29<br>** | 0.61<br>**  | 0.61<br>**  | 0.26<br>**  | -0.70<br>** |
| <b>TKW</b>  |            |            |             |             |             |             |             |             |            |             |             |             |             | 0.44<br>**  | 0.85<br>**  | 0.77<br>**  | 0.83<br>**  | -0.47<br>** |
| <b>SL</b>   |            |            |             |             |             |             |             |             |            |             |             |             |             |             | 0.26<br>**  | 0.13<br>*   | 0.74<br>**  | 0.21<br>**  |
| <b>SW</b>   |            |            |             |             |             |             |             |             |            |             |             |             |             |             |             | 0.87<br>**  | 0.83<br>**  | -0.56<br>** |
| <b>ST</b>   |            |            |             |             |             |             |             |             |            |             |             |             |             |             |             |             | 0.66<br>**  | -0.58<br>** |
| <b>SA</b>   |            |            |             |             |             |             |             |             |            |             |             |             |             |             |             |             |             | -0.27<br>** |

15 \*\* Correlation is significant at 0.01 level; \* Correlation is significant at 0.05 level.

| Traits      | Environment 1 (E1) |       |       |       |       | Environment 2 (E2) |       |       |       |       | Environment 3 (E3) |       |       |       |       |       |
|-------------|--------------------|-------|-------|-------|-------|--------------------|-------|-------|-------|-------|--------------------|-------|-------|-------|-------|-------|
|             | PC1                | PC2   | PC3   | PC4   | PC5   | PC1                | PC2   | PC3   | PC4   | PC5   | PC1                | PC2   | PC3   | PC4   | PC5   | PC6   |
| <b>HT</b>   | -0.70              | 0.12  | 0.51  | 0.43  | -0.05 | -0.19              | 0.86  | -0.22 | -0.17 | 0.19  | -0.72              | -0.08 | 0.42  | 0.13  | 0.37  | -0.09 |
| <b>FT</b>   | -0.70              | 0.11  | 0.52  | 0.41  | -0.04 | -0.19              | 0.86  | -0.23 | -0.17 | 0.19  | -0.57              | -0.03 | 0.37  | 0.13  | 0.61  | 0.07  |
| <b>MT</b>   | -0.66              | 0.10  | 0.44  | 0.37  | -0.04 | 0.11               | 0.80  | -0.26 | -0.14 | 0.12  | -0.45              | -0.09 | 0.60  | 0.11  | 0.29  | 0.12  |
| <b>PH</b>   | 0.51               | 0.39  | 0.57  | 0.01  | -0.23 | 0.57               | 0.42  | -0.20 | 0.23  | 0.33  | 0.62               | 0.47  | 0.24  | 0.04  | 0.11  | 0.47  |
| <b>TTN</b>  | -0.03              | 0.72  | -0.29 | 0.21  | 0.32  | -0.15              | 0.43  | 0.72  | 0.27  | -0.11 | -0.30              | -0.29 | -0.38 | 0.67  | -0.03 | 0.25  |
| <b>ETN</b>  | -0.09              | 0.71  | -0.50 | 0.13  | 0.28  | -0.10              | 0.39  | 0.74  | 0.32  | -0.11 | -0.19              | -0.34 | -0.37 | 0.71  | 0.05  | 0.25  |
| <b>SpL</b>  | 0.61               | 0.17  | 0.37  | -0.17 | -0.03 | 0.60               | -0.09 | -0.15 | 0.56  | -0.06 | 0.54               | 0.28  | 0.26  | 0.22  | -0.36 | 0.08  |
| <b>PL</b>   | 0.55               | 0.48  | 0.26  | -0.23 | -0.10 | 0.49               | 0.10  | -0.20 | 0.51  | 0.25  | 0.64               | 0.52  | 0.13  | 0.05  | -0.02 | 0.36  |
| <b>FLA</b>  | 0.77               | -0.09 | 0.15  | -0.23 | -0.07 | 0.70               | -0.22 | -0.22 | 0.24  | -0.17 | 0.51               | 0.15  | 0.30  | 0.37  | -0.34 | -0.40 |
| <b>SLA</b>  | 0.78               | 0.01  | 0.39  | -0.16 | -0.09 | 0.77               | -0.22 | -0.24 | 0.31  | -0.09 | 0.31               | 0.18  | 0.53  | 0.39  | 0.05  | -0.37 |
| <b>SAng</b> | 0.32               | 0.33  | -0.21 | -0.18 | -0.29 | 0.15               | -0.08 | -0.03 | 0.22  | 0.61  | 0.20               | -0.26 | 0.23  | -0.45 | -0.01 | 0.41  |
| <b>BPP</b>  | 0.32               | 0.81  | 0.10  | 0.22  | -0.07 | 0.16               | 0.71  | 0.18  | 0.22  | -0.08 | 0.63               | -0.04 | 0.33  | 0.31  | -0.09 | 0.25  |
| <b>YPP</b>  | 0.54               | 0.57  | -0.17 | 0.25  | -0.12 | 0.47               | 0.32  | 0.50  | 0.16  | -0.09 | 0.52               | -0.71 | 0.18  | -0.01 | -0.11 | 0.01  |
| <b>TKW</b>  | 0.78               | -0.17 | -0.09 | 0.44  | 0.17  | 0.80               | 0.09  | 0.21  | -0.39 | 0.09  | 0.82               | -0.21 | -0.17 | -0.05 | 0.35  | -0.13 |
| <b>SL</b>   | 0.56               | -0.19 | 0.33  | 0.02  | 0.62  | 0.60               | 0.32  | -0.17 | -0.25 | -0.43 | 0.41               | 0.57  | -0.39 | 0.06  | 0.49  | -0.06 |
| <b>SW</b>   | 0.74               | -0.30 | -0.11 | 0.45  | -0.08 | 0.80               | -0.12 | 0.27  | -0.35 | 0.18  | 0.89               | -0.30 | -0.05 | 0.01  | 0.18  | -0.09 |



|                                    |       |       |       |       |       |       |       |       |       |       |       |       |       |       |       |       |
|------------------------------------|-------|-------|-------|-------|-------|-------|-------|-------|-------|-------|-------|-------|-------|-------|-------|-------|
| <b>ST</b>                          | 0.57  | -0.21 | -0.17 | 0.34  | -0.21 | 0.70  | -0.11 | 0.32  | -0.34 | 0.14  | 0.78  | -0.40 | 0.03  | -0.01 | 0.20  | -0.11 |
| <b>SA</b>                          | 0.79  | -0.30 | 0.16  | 0.35  | 0.27  | 0.88  | 0.04  | 0.05  | -0.32 | -0.10 | 0.84  | 0.12  | -0.25 | 0.04  | 0.40  | -0.10 |
| <b>T</b>                           | -0.18 | 0.26  | 0.39  | -0.47 | 0.39  | 0.12  | 0.47  | -0.41 | 0.10  | -0.54 | -0.48 | 0.66  | -0.19 | 0.10  | -0.04 | -0.10 |
| <b>Eigen value</b>                 | 6.53  | 2.91  | 2.19  | 1.70  | 1.07  | 5.31  | 3.71  | 2.14  | 1.71  | 1.25  | 6.50  | 2.48  | 1.95  | 1.66  | 1.47  | 1.10  |
| <b>Proportional<br/>variance %</b> | 34.39 | 15.33 | 11.52 | 8.96  | 5.61  | 27.95 | 19.55 | 11.24 | 8.99  | 6.58  | 34.22 | 13.08 | 10.25 | 8.72  | 7.74  | 5.80  |
| <b>Cumulative<br/>variance %</b>   | 34.39 | 49.72 | 61.24 | 70.20 | 75.81 | 27.95 | 47.50 | 58.75 | 67.74 | 74.32 | 34.22 | 47.29 | 57.55 | 66.27 | 74.01 | 79.81 |

18 Supplementary Table S5: Grouping of accessions using cluster analysis based on principal component  
19 analysis performed in three environments separately.

| Environ-<br>ment | Cluster (%<br>accession) | Accessions under corresponding cluster                                                                                                                                                                                                                                                                                                                                                                                                                                             |
|------------------|--------------------------|------------------------------------------------------------------------------------------------------------------------------------------------------------------------------------------------------------------------------------------------------------------------------------------------------------------------------------------------------------------------------------------------------------------------------------------------------------------------------------|
| E1               | 1 (26%)                  | TD16, TD18, TD19, TD22, TD23, TD28, TD37, TD42, TD43, TD46, TD50, TD55, TD60, TD66, TD69, TD70, TD72, TD73, TD74, TD75, TD78, TD82, TD87, TD89, TD98, TD101, TD112, TD118, TD125, TD135, TD137, TD166, TD181, TD246, TD260, TD263, TD268, TD283, TD310, TD314, TD326, TD380, TD386, TD403, TD407, TD409, TD410, TD413, TD415, TD453, TD460, TD522, TD543, TD646, TD694, TD721, TD743, TD761, TD764, TD767, TRTD04, TRTD06, TRTD07, TRTD13, TRTD26, TRTD27, TRTD40, TRTD41, TRTD54. |
|                  | 2 (23%)                  | TD12, TD13, TD20, TD21, TD24, TD26, TD38, TD39, TD44, TD45, TD48, TD53, TD54, TD56, TD61, TD71, TD81, TD84, TD90, TD95, TD106, TD110, TD123, TD126, TD130, TD139, TD140, TD141, TD148, TD164, TD165, TD216, TD301, TD316, TD317, TD383, TD392, TD393, TD405, TD416, TD419, TD421, TD422, TD459, TD464, TD517, TD518, TD526, TD546, TD554, TD734, TD768, TD770, TD771, TD774, TRTD12, TRTD16, TRTD37, TRTD66.                                                                       |
|                  | 3 (12%)                  | TD14, TD35, TD120, TD121, 159, TD182, TD195, TD202, TD211, TD220, TD247, TD265, TD305, TD385, TD429, TD436, TD454, TD463, TD529, TD534, TD535, TD550, TD575, TD577, TD745, TD772, TRTD19, TRTD21, TRTD31, TRTD36, TRTD39, TRTD64, TRTD65.                                                                                                                                                                                                                                          |
|                  | 4 (13%)                  | TD9, TD25, TD49, TD64, TD124, TD136, TD203, TD205, TD206, TD230, TD292, TD330, TD427, TD430, TD450, TD511, TD528, TD532, TD533, TD540, TD544, TD570, TD571, TD572, TD580, TD591, TD592, TD639, TD640, TRTD42, TRTD43, TRTD45, TRTD51, TRTD53, TRTD60.                                                                                                                                                                                                                              |
|                  | 5 (26%)                  | TD8, TD10, TD30, TD33, TD34, TD40, TD41, TD47, TD51, TD52, TD57, TD58, TD62, TD65, TD79, TD94, TD96, TD108, TD142, TD161, TD167, TD169, TD204, TD252, TD256, TD272, TD304, TD333, TD398, TD412, TD417, TD418, TD420, TD425, TD440, TD513, TD525, TD537, TD538, TD545, TD574, TD576,                                                                                                                                                                                                |

|    |         |                                                                                                                                                                                                                                                                                                                                                                                                                                                                                                                                                                                                                                 |
|----|---------|---------------------------------------------------------------------------------------------------------------------------------------------------------------------------------------------------------------------------------------------------------------------------------------------------------------------------------------------------------------------------------------------------------------------------------------------------------------------------------------------------------------------------------------------------------------------------------------------------------------------------------|
|    |         | TD722, TD728, TD741, TD766, TD773, TRTD03, TRTD08, TRTD09, TRTD10, TRTD11, TRTD14, TRTD15, TRTD17, TRTD20, TRTD22, TRTD24, TRTD25, TRTD29, TRTD30, TRTD32, TRTD38, TRTD57, TRTD61, TRTD69.                                                                                                                                                                                                                                                                                                                                                                                                                                      |
| E2 | 1 (42%) | TD10, TD13, TD16, TD20, TD21, TD22, TD24, TD25, TD28, TD34, TD41, TD47, TD52, TD54, TD56, TD58, TD62, TD64, TD65, TD71, TD78, TD79, TD81, TD82, TD98, TD120, TD121, TD126, TD136, TD159, TD166, TD182, TD202, TD203, TD204, TD205, TD206, TD211, TD220, TD230, TD247, TD265, TD268, TD305, TD316, TD330, TD333, TD383, TD386, TD398, TD407, TD410, TD412, TD417, TD420, TD427, TD429, TD430, TD436, TD454, TD511, TD522, TD540, TD546, TD550, TD570, TD571, TD572, TD574, TD577, TD580, TD591, TD592, TD640, TD651, TD694, TD722, TD745, TD773, TRTD37, TRTD43, TRTD45, TRTD51, TRTD53, TRTD54, TRTD60, TRTD61, TRTD64, TRTD69. |
|    | 2 (34%) | TD8, TD9, TD12, TD19, TD26, TD37, TD38, TD39, TD42, TD43, TD44, TD45, TD46, TD48, TD50, TD53, TD55, TD57, TD61, TD69, TD72, TD73, TD74, TD75, TD90, TD95, TD96, TD101, TD123, TD124, TD125, TD135, TD139, TD140, TD195, TD216, TD246, TD260, TD263, TD272, TD301, TD304, TD310, TD314, TD317, TD380, TD392, TD393, TD409, TD413, TD415, TD416, TD418, TD440, TD450, TD459, TD463, TD464, TD517, TD529, TD543, TD544, TD554, TD639, TD721, TD728, TD761, TD764, TD768, TD770, TD771, TRTD07, TRTD12, TRTD42, TRTD57.                                                                                                             |
|    | 3 (13%) | TD23, TD66, TD89, TD94, TD106, TD110, TD112, TD118, TD142, TD148, TD164, TD165, TD167, TD169, TD181, TD252, TD256, TD419, TD421, TD422, TD453, TD576, TD734, TD743, TD767, TRTD03, TRTD04, TRTD08, TRTD10, TRTD41.                                                                                                                                                                                                                                                                                                                                                                                                              |
|    | 4 (11%) | TD425, TD534, TD535, TD741, TD766, TRTD06, TRTD09, TRTD11, TRTD13, TRTD14, TRTD16, TRTD19, TRTD20, TRTD21, TRTD22, TRTD26, TRTD29, TRTD30, TRTD32, TRTD38, TRTD39, TRTD40.                                                                                                                                                                                                                                                                                                                                                                                                                                                      |
| E3 | 1 (22%) | TD13, TD18, TD19, TD21, TD23, TD24, TD26, TD28, TD38, TD39, TD47, TD50, TD56, TD58, TD61, TD65, TD66, TD72, TD73, TD78, TD82, TD94, TD95, TD106, TD118, TD316, TD410, TD417, TD418, TD420, TD440, TD517,                                                                                                                                                                                                                                                                                                                                                                                                                        |

|  |         |                                                                                                                                                                                                                                                                                                                                                                                                                                                                                    |
|--|---------|------------------------------------------------------------------------------------------------------------------------------------------------------------------------------------------------------------------------------------------------------------------------------------------------------------------------------------------------------------------------------------------------------------------------------------------------------------------------------------|
|  |         | TD518, TD526, TD571, TD694, TD743, TD764, TD767, TRTD07, TRTD09, TRTD11, TRTD12, TRTD17, TRTD37, TRTD38.                                                                                                                                                                                                                                                                                                                                                                           |
|  | 2 (6%)  | TD10, TD159, TD202, TD436, TD513, TD570, TD580, TD773, TRTD42, TRTD51, TRTD53, TRTD66, TRTD69.                                                                                                                                                                                                                                                                                                                                                                                     |
|  | 3 (8%)  | TD120, TD121, TD205, TD230, TD292, TD326, TD427, TD429, TD430, TD525, TD540, TD544, TD550, TD639, TD651, TRTD57.                                                                                                                                                                                                                                                                                                                                                                   |
|  | 4 (16%) | TD12, TD14, TD52, TD55, TD126, TD136, TD166, TD167, TD181, TD204, TD246, TD272, TD314, TD330, TD333, TD392, TD409, TD453, TD463, TD464, TD529, TD534, TD535, TD537, TD538, TD546, TD554, TD574, TD640, TD728, TD741, TD766, TRTD03, TRTD20, TRTD32.                                                                                                                                                                                                                                |
|  | 5 (30%) | TD9, TD16, TD20, TD34, TD37, TD41, TD43, TD44, TD45, TD48, TD53, TD60, TD62, TD69, TD71, TD74, TD75, TD79, TD81, TD87, TD96, TD101, TD108, TD123, TD124, TD125, TD130, TD135, TD140, TD141, TD164, TD211, TD216, TD256, TD260, TD263, TD268, TD301, TD17, TD380, TD383, TD393, TD398, TD407, TD412, TD413, TD415, TD416, TD422, TD454, TD459, TD522, TD543, TD545, TD572, TD592, TD721, TD734, TD768, TD770, TD771, TD774, TRTD04, TRTD06, TRTD14, TRTD22, TRTD25, TRTD26, TRTD30. |
|  | 6 (18%) | TD8, TD22, TD30, TD33, TD40, TD42, TD46, TD51, TD54, TD70, TD84, TD90, TD98, TD110, TD112, TD137, TD139, TD142, TD148, TD165, TD169, TD182, TD252, TD304, TD305, TD310, TD382, TD386, TD403, TD405, TD419, TD 21, TRTD08, TRTD10, TRTD15, TRTD16, TRTD19, TRTD24, TRTD27, TRTD41.                                                                                                                                                                                                  |

20

21 Supplementary Table S6: Standardized genotype by yield\*trait (GYT) data along with superiority  
22 index. Top 23 ranked genotypes are highlighted here. The trait abbreviations are Y: Yield; F: Flowering  
23 time; E: Effective tiller number; S: Spike length; FL: Flag leaf area; SA: Shoot angle; B: Biomass/plant;  
24 TKW: Thousand kernel weight; SW: Seed width; and T: Threshability.

| Genotype      | Y/F         | Y*E         | Y*S         | Y*FL         | Y*SA        | Y*B         | Y*TK        | Y*SW        | Y/T         | Mean              |
|---------------|-------------|-------------|-------------|--------------|-------------|-------------|-------------|-------------|-------------|-------------------|
| s             |             |             |             |              |             |             | W           |             |             | superiority index |
| <b>TD534</b>  | <b>6.82</b> | <b>5.33</b> | <b>6.16</b> | <b>2.34</b>  | <b>5.77</b> | <b>7.64</b> | <b>8.01</b> | <b>6.90</b> | <b>6.49</b> | <b>6.16</b>       |
| <b>Mace</b>   | <b>5.26</b> | <b>4.18</b> | <b>4.16</b> | <b>9.33</b>  | <b>5.06</b> | <b>3.29</b> | <b>4.79</b> | <b>4.86</b> | <b>5.24</b> | <b>5.13</b>       |
| <b>TD120</b>  | <b>4.98</b> | <b>6.11</b> | <b>5.51</b> | <b>1.14</b>  | <b>5.84</b> | <b>6.12</b> | <b>3.82</b> | <b>5.09</b> | <b>6.29</b> | <b>4.99</b>       |
| <b>Suntop</b> | <b>5.05</b> | <b>3.18</b> | <b>4.18</b> | <b>8.30</b>  | <b>4.97</b> | <b>3.26</b> | <b>5.09</b> | <b>4.77</b> | <b>5.11</b> | <b>4.88</b>       |
| <b>Yitpi</b>  | <b>4.03</b> | <b>2.85</b> | <b>4.70</b> | <b>7.04</b>  | <b>5.04</b> | <b>3.52</b> | <b>3.91</b> | <b>4.30</b> | <b>4.98</b> | <b>4.49</b>       |
| <b>TD535</b>  | <b>4.75</b> | <b>4.37</b> | <b>4.35</b> | <b>1.48</b>  | <b>3.75</b> | <b>3.77</b> | <b>5.40</b> | <b>4.75</b> | <b>4.66</b> | <b>4.14</b>       |
| <b>TD121</b>  | <b>3.39</b> | <b>4.38</b> | <b>4.01</b> | <b>0.77</b>  | <b>3.80</b> | <b>3.09</b> | <b>2.78</b> | <b>3.52</b> | <b>4.66</b> | <b>3.38</b>       |
| <b>TD8</b>    | <b>1.87</b> | <b>1.32</b> | <b>2.31</b> | <b>0.26</b>  | <b>2.45</b> | <b>3.10</b> | <b>1.62</b> | <b>1.99</b> | <b>0.78</b> | <b>1.74</b>       |
| <b>TD9</b>    | <b>1.75</b> | <b>2.52</b> | <b>1.77</b> | <b>0.24</b>  | <b>2.00</b> | <b>2.06</b> | <b>2.03</b> | <b>2.01</b> | <b>1.20</b> | <b>1.73</b>       |
| <b>TD70</b>   | <b>1.38</b> | <b>1.79</b> | <b>2.01</b> | <b>0.33</b>  | <b>1.21</b> | <b>2.53</b> | <b>1.33</b> | <b>1.42</b> | <b>0.40</b> | <b>1.38</b>       |
| <b>TD453</b>  | <b>1.28</b> | <b>2.35</b> | <b>1.18</b> | <b>0.04</b>  | <b>1.51</b> | <b>1.14</b> | <b>0.99</b> | <b>1.43</b> | <b>0.85</b> | <b>1.20</b>       |
| <b>TD216</b>  | <b>1.34</b> | <b>1.85</b> | <b>1.19</b> | <b>0.23</b>  | <b>1.03</b> | <b>1.15</b> | <b>1.21</b> | <b>1.15</b> | <b>0.61</b> | <b>1.08</b>       |
| <b>TD166</b>  | <b>1.14</b> | <b>2.06</b> | <b>1.03</b> | <b>0.01</b>  | <b>1.22</b> | <b>1.22</b> | <b>0.62</b> | <b>1.18</b> | <b>1.07</b> | <b>1.06</b>       |
| <b>TD110</b>  | <b>1.24</b> | <b>0.70</b> | <b>1.52</b> | <b>0.20</b>  | <b>0.98</b> | <b>1.88</b> | <b>1.06</b> | <b>1.28</b> | <b>0.34</b> | <b>1.02</b>       |
| <b>TD256</b>  | <b>1.07</b> | <b>1.61</b> | <b>0.86</b> | <b>0.06</b>  | <b>1.05</b> | <b>1.13</b> | <b>1.12</b> | <b>1.02</b> | <b>0.26</b> | <b>0.91</b>       |
| <b>TD574</b>  | <b>0.87</b> | <b>2.08</b> | <b>1.17</b> | <b>0.04</b>  | <b>1.19</b> | <b>1.06</b> | <b>0.53</b> | <b>0.86</b> | <b>0.28</b> | <b>0.90</b>       |
| <b>TD743</b>  | <b>0.68</b> | <b>2.09</b> | <b>0.77</b> | <b>-0.10</b> | <b>0.12</b> | <b>1.00</b> | <b>1.00</b> | <b>0.68</b> | <b>0.11</b> | <b>0.71</b>       |
| <b>TD771</b>  | <b>0.69</b> | <b>0.54</b> | <b>0.86</b> | <b>0.10</b>  | <b>0.67</b> | <b>0.96</b> | <b>0.79</b> | <b>0.77</b> | <b>0.13</b> | <b>0.61</b>       |
| <b>TD454</b>  | <b>0.51</b> | <b>0.47</b> | <b>1.20</b> | <b>-0.09</b> | <b>0.98</b> | <b>1.12</b> | <b>0.10</b> | <b>0.51</b> | <b>0.42</b> | <b>0.58</b>       |
| <b>TD74</b>   | <b>0.74</b> | <b>0.19</b> | <b>0.98</b> | <b>0.20</b>  | <b>0.98</b> | <b>0.51</b> | <b>0.58</b> | <b>0.84</b> | <b>0.17</b> | <b>0.58</b>       |
| <b>TD130</b>  | <b>0.63</b> | <b>0.47</b> | <b>0.87</b> | <b>0.02</b>  | <b>0.66</b> | <b>0.62</b> | <b>0.64</b> | <b>0.64</b> | <b>0.11</b> | <b>0.52</b>       |
| <b>TD112</b>  | <b>0.55</b> | <b>0.22</b> | <b>0.85</b> | <b>0.07</b>  | <b>0.22</b> | <b>0.82</b> | <b>0.55</b> | <b>0.58</b> | <b>0.08</b> | <b>0.44</b>       |
| <b>TD123</b>  | <b>0.51</b> | <b>0.43</b> | <b>0.84</b> | <b>0.03</b>  | <b>0.59</b> | <b>0.40</b> | <b>0.42</b> | <b>0.41</b> | <b>0.05</b> | <b>0.41</b>       |
| TD263         | 0.23        | 0.42        | 0.40        | 0.00         | 0.39        | 0.15        | 0.24        | 0.29        | 0.93        | 0.34              |
| TD518         | 0.36        | 0.43        | 0.44        | -0.04        | 0.16        | 0.68        | 0.48        | 0.36        | 0.00        | 0.32              |
| TD463         | 0.20        | 1.11        | 0.31        | 0.08         | 0.36        | 0.21        | 0.18        | 0.24        | -0.02       | 0.30              |
| TD405         | 0.34        | -0.03       | 0.44        | -0.07        | 0.53        | 0.52        | 0.41        | 0.31        | -0.01       | 0.27              |

|        |      |       |       |       |       |       |       |       |       |       |
|--------|------|-------|-------|-------|-------|-------|-------|-------|-------|-------|
| TD55   | 0.34 | 0.64  | 0.25  | -0.11 | 0.32  | 0.28  | 0.21  | 0.34  | 0.00  | 0.25  |
| TRTD16 | 0.37 | 0.70  | 0.36  | -0.06 | 0.06  | 0.14  | 0.21  | 0.30  | 0.00  | 0.23  |
| TD34   | 0.23 | 0.41  | 0.32  | 0.00  | 0.35  | 0.47  | 0.13  | 0.20  | -0.04 | 0.23  |
| TD592  | 0.26 | 0.90  | 0.15  | -0.19 | 0.33  | 0.25  | 0.14  | 0.18  | 0.01  | 0.23  |
| TD51   | 0.20 | 0.49  | 0.36  | -0.06 | 0.27  | 0.35  | 0.22  | 0.21  | -0.06 | 0.22  |
| TRTD24 | 0.36 | -0.01 | 0.45  | 0.06  | 0.18  | 0.32  | 0.31  | 0.31  | 0.01  | 0.22  |
| TRTD37 | 0.23 | 0.99  | 0.16  | -0.07 | -0.10 | 0.24  | 0.20  | 0.25  | -0.04 | 0.21  |
| TD56   | 0.15 | 0.30  | 0.40  | 0.00  | 0.02  | 0.47  | 0.10  | 0.14  | -0.07 | 0.17  |
| TD22   | 0.19 | 0.35  | 0.23  | 0.07  | 0.04  | 0.20  | 0.22  | 0.19  | -0.05 | 0.16  |
| TD24   | 0.16 | 0.85  | 0.19  | -0.06 | -0.03 | 0.11  | 0.12  | 0.15  | -0.07 | 0.16  |
| TD30   | 0.15 | 0.40  | 0.29  | -0.04 | 0.01  | 0.46  | 0.05  | 0.17  | -0.07 | 0.16  |
| TD60   | 0.15 | 0.29  | 0.14  | -0.13 | 0.36  | 0.25  | 0.11  | 0.16  | -0.07 | 0.14  |
| TD392  | 0.14 | 0.10  | 0.31  | -0.02 | 0.21  | 0.34  | 0.11  | 0.14  | -0.08 | 0.14  |
| TD54   | 0.24 | 0.35  | 0.40  | -0.14 | 0.00  | 0.14  | 0.13  | 0.18  | -0.12 | 0.13  |
| TD125  | 0.08 | 0.37  | 0.30  | -0.12 | 0.06  | 0.32  | 0.08  | 0.09  | -0.10 | 0.12  |
| TD33   | 0.18 | -0.06 | 0.34  | 0.06  | -0.15 | 0.36  | 0.15  | 0.15  | -0.06 | 0.11  |
| TD62   | 0.01 | 0.09  | -0.07 | -0.09 | 0.32  | 0.09  | 0.34  | 0.21  | -0.09 | 0.09  |
| TD13   | 0.09 | 0.08  | 0.31  | 0.04  | -0.05 | 0.21  | 0.03  | 0.05  | -0.08 | 0.07  |
| TRTD22 | 0.14 | -0.11 | 0.08  | -0.09 | 0.22  | 0.02  | 0.24  | 0.17  | -0.08 | 0.07  |
| TD330  | 0.09 | 0.31  | -0.04 | -0.22 | -0.05 | -0.05 | 0.19  | 0.06  | 0.16  | 0.05  |
| TD305  | 0.04 | 0.13  | 0.35  | 0.03  | -0.29 | 0.20  | 0.07  | 0.03  | -0.12 | 0.05  |
| TD169  | 0.03 | 0.50  | 0.09  | -0.06 | 0.00  | -0.08 | 0.08  | -0.01 | -0.12 | 0.05  |
| TD382  | 0.04 | 0.24  | 0.22  | -0.03 | -0.23 | 0.23  | 0.01  | 0.07  | -0.12 | 0.05  |
| TRTD15 | 0.02 | 0.15  | 0.13  | 0.05  | -0.13 | 0.28  | -0.05 | -0.04 | -0.12 | 0.03  |
| TD386  | 0.03 | 0.24  | 0.11  | -0.03 | -0.35 | 0.21  | 0.14  | 0.04  | -0.13 | 0.03  |
| TD84   | 0.05 | 0.01  | 0.13  | -0.06 | 0.14  | -0.08 | 0.08  | 0.07  | -0.11 | 0.03  |
| TD108  | 0.04 | 0.07  | -0.02 | -0.08 | 0.08  | 0.12  | 0.04  | 0.07  | -0.12 | 0.02  |
| TD766  | 0.07 | 0.29  | -0.15 | -0.18 | -0.06 | 0.10  | 0.05  | 0.08  | -0.11 | 0.01  |
| TD417  | 0.05 | 0.07  | 0.09  | -0.08 | -0.10 | 0.05  | 0.00  | 0.03  | -0.12 | 0.00  |
| TD202  | 0.11 | 0.54  | 0.12  | -0.19 | -0.17 | -0.27 | -0.02 | 0.02  | -0.19 | -0.01 |

|        |       |       |       |       |       |       |       |       |       |       |
|--------|-------|-------|-------|-------|-------|-------|-------|-------|-------|-------|
| TD164  | 0.02  | 0.13  | -0.06 | -0.08 | 0.00  | 0.00  | 0.04  | 0.01  | -0.12 | -0.01 |
| TD87   | 0.05  | -0.09 | 0.07  | -0.06 | 0.01  | 0.08  | -0.06 | 0.03  | -0.11 | -0.01 |
| TD464  | 0.05  | -0.26 | 0.24  | -0.05 | 0.08  | -0.15 | 0.04  | 0.04  | -0.11 | -0.01 |
| TD418  | -0.03 | 0.44  | -0.05 | -0.14 | -0.30 | 0.29  | -0.14 | -0.06 | -0.14 | -0.01 |
| TD101  | 0.01  | -0.11 | 0.11  | -0.09 | 0.10  | -0.06 | 0.00  | 0.02  | -0.12 | -0.01 |
| TD768  | -0.01 | 0.02  | -0.01 | -0.14 | 0.07  | -0.09 | 0.06  | 0.05  | -0.13 | -0.02 |
| TD413  | -0.04 | -0.16 | 0.01  | -0.07 | 0.09  | 0.05  | 0.03  | 0.01  | -0.14 | -0.02 |
| TD61   | -0.10 | 0.07  | 0.06  | -0.05 | -0.23 | -0.13 | 0.25  | 0.05  | -0.14 | -0.03 |
| TD517  | -0.01 | -0.03 | 0.05  | -0.06 | -0.13 | 0.02  | 0.00  | 0.00  | -0.14 | -0.03 |
| TD734  | 0.05  | -0.08 | -0.10 | -0.13 | 0.06  | 0.01  | -0.04 | 0.03  | -0.11 | -0.04 |
| TD571  | -0.10 | 0.36  | -0.01 | -0.13 | -0.16 | -0.03 | -0.02 | -0.12 | -0.13 | -0.04 |
| TD19   | -0.01 | -0.08 | -0.04 | -0.14 | -0.14 | 0.16  | -0.01 | -0.01 | -0.14 | -0.04 |
| TD79   | 0.01  | -0.07 | 0.02  | -0.13 | 0.01  | -0.01 | -0.10 | -0.04 | -0.14 | -0.05 |
| TD42   | -0.03 | 0.08  | 0.04  | -0.12 | -0.13 | 0.04  | -0.17 | -0.02 | -0.14 | -0.05 |
| TD140  | -0.02 | -0.08 | 0.02  | -0.05 | 0.04  | -0.12 | -0.11 | -0.02 | -0.14 | -0.05 |
| TD639  | -0.03 | -0.09 | -0.11 | -0.23 | 0.19  | -0.12 | 0.09  | -0.08 | -0.11 | -0.05 |
| TD304  | -0.02 | -0.16 | 0.09  | -0.15 | -0.19 | 0.06  | -0.01 | -0.05 | -0.14 | -0.06 |
| TD139  | -0.07 | -0.08 | 0.02  | -0.09 | -0.07 | 0.19  | -0.24 | -0.11 | -0.15 | -0.07 |
| TD421  | -0.17 | 0.31  | -0.01 | -0.11 | -0.30 | 0.05  | -0.08 | -0.13 | -0.20 | -0.07 |
| TD537  | -0.11 | 0.43  | -0.07 | -0.22 | -0.08 | -0.32 | -0.04 | -0.08 | -0.17 | -0.07 |
| TD416  | -0.05 | -0.34 | -0.12 | -0.07 | 0.11  | -0.01 | -0.08 | -0.03 | -0.15 | -0.08 |
| TD12   | -0.12 | 0.40  | -0.12 | -0.08 | -0.01 | -0.28 | -0.23 | -0.16 | -0.18 | -0.09 |
| TD316  | -0.08 | -0.12 | -0.01 | -0.04 | -0.18 | -0.16 | 0.00  | -0.04 | -0.16 | -0.09 |
| TD764  | -0.16 | 0.44  | -0.06 | -0.10 | -0.34 | 0.16  | -0.33 | -0.23 | -0.19 | -0.09 |
| TD37   | -0.13 | 0.08  | -0.21 | -0.17 | -0.07 | -0.08 | 0.03  | -0.10 | -0.17 | -0.09 |
| TRTD41 | -0.16 | 0.34  | -0.18 | -0.03 | -0.12 | -0.08 | -0.24 | -0.24 | -0.19 | -0.10 |
| TD73   | -0.16 | -0.14 | -0.16 | 0.01  | -0.18 | -0.08 | -0.02 | -0.06 | -0.17 | -0.11 |
| TD142  | -0.10 | -0.01 | -0.12 | -0.17 | -0.18 | -0.12 | -0.13 | -0.09 | -0.17 | -0.12 |
| TD721  | -0.09 | -0.22 | -0.11 | -0.12 | -0.08 | -0.13 | -0.12 | -0.06 | -0.16 | -0.12 |
| TD46   | -0.16 | -0.05 | -0.11 | -0.07 | -0.19 | -0.02 | -0.16 | -0.16 | -0.18 | -0.12 |

|        |       |       |       |       |       |       |       |       |       |       |
|--------|-------|-------|-------|-------|-------|-------|-------|-------|-------|-------|
| TD546  | -0.08 | 0.03  | -0.19 | -0.21 | -0.08 | -0.21 | -0.10 | -0.14 | -0.21 | -0.13 |
| TD106  | -0.11 | -0.22 | -0.17 | -0.11 | -0.18 | 0.03  | -0.15 | -0.12 | -0.17 | -0.13 |
| TD260  | -0.11 | -0.11 | -0.22 | -0.08 | -0.05 | -0.21 | -0.19 | -0.14 | -0.17 | -0.14 |
| TD380  | -0.17 | -0.27 | -0.17 | -0.11 | -0.10 | 0.00  | -0.14 | -0.15 | -0.18 | -0.14 |
| TD141  | -0.13 | -0.29 | -0.13 | -0.17 | -0.07 | 0.01  | -0.17 | -0.15 | -0.19 | -0.14 |
| TD90   | -0.13 | -0.40 | -0.12 | -0.11 | -0.05 | -0.06 | -0.10 | -0.15 | -0.18 | -0.14 |
| TD159  | -0.06 | -0.19 | -0.08 | -0.09 | -0.38 | -0.24 | -0.08 | -0.11 | -0.15 | -0.15 |
| TD136  | -0.10 | -0.41 | -0.28 | -0.18 | 0.03  | -0.14 | -0.11 | -0.12 | -0.15 | -0.16 |
| TD182  | -0.17 | -0.50 | -0.25 | -0.04 | -0.02 | 0.09  | -0.22 | -0.18 | -0.20 | -0.16 |
| TD393  | -0.19 | 0.08  | -0.17 | -0.20 | -0.23 | -0.17 | -0.20 | -0.20 | -0.20 | -0.17 |
| TD403  | -0.17 | -0.31 | -0.17 | -0.19 | -0.08 | -0.12 | -0.13 | -0.14 | -0.20 | -0.17 |
| TD40   | -0.17 | -0.31 | -0.13 | -0.13 | -0.12 | -0.16 | -0.10 | -0.18 | -0.20 | -0.17 |
| TD526  | -0.13 | -0.26 | 0.01  | -0.15 | -0.30 | -0.23 | -0.09 | -0.18 | -0.18 | -0.17 |
| TD572  | -0.22 | 0.13  | -0.28 | -0.19 | -0.08 | -0.22 | -0.26 | -0.24 | -0.19 | -0.17 |
| TD165  | -0.09 | -0.31 | -0.13 | -0.12 | -0.16 | -0.26 | -0.17 | -0.14 | -0.17 | -0.17 |
| TD71   | -0.12 | -0.33 | -0.15 | -0.15 | 0.00  | -0.29 | -0.18 | -0.19 | -0.18 | -0.18 |
| TD383  | -0.15 | -0.27 | -0.17 | -0.10 | 0.00  | -0.27 | -0.31 | -0.19 | -0.18 | -0.18 |
| TD20   | -0.16 | -0.50 | -0.10 | -0.13 | -0.03 | -0.07 | -0.23 | -0.23 | -0.23 | -0.19 |
| TD148  | -0.27 | -0.21 | -0.17 | -0.09 | -0.15 | 0.02  | -0.28 | -0.29 | -0.23 | -0.19 |
| TD543  | -0.23 | -0.42 | -0.18 | -0.14 | -0.12 | -0.17 | -0.15 | -0.19 | -0.22 | -0.20 |
| TD407  | -0.22 | -0.16 | -0.18 | -0.14 | -0.13 | -0.40 | -0.15 | -0.23 | -0.21 | -0.20 |
| TD65   | -0.18 | -0.31 | -0.19 | -0.16 | -0.32 | -0.12 | -0.17 | -0.23 | -0.20 | -0.21 |
| TRTD08 | -0.21 | -0.43 | -0.18 | -0.10 | -0.21 | -0.22 | -0.21 | -0.23 | -0.21 | -0.22 |
| TD137  | -0.19 | -0.51 | -0.17 | -0.14 | -0.38 | -0.18 | -0.10 | -0.17 | -0.20 | -0.23 |
| TD205  | -0.17 | -0.15 | -0.28 | -0.24 | -0.14 | -0.44 | -0.18 | -0.24 | -0.25 | -0.23 |
| TD78   | -0.20 | -0.46 | -0.17 | -0.15 | -0.22 | -0.26 | -0.22 | -0.18 | -0.21 | -0.23 |
| TRTD07 | -0.24 | -0.46 | -0.14 | -0.11 | -0.29 | -0.15 | -0.25 | -0.24 | -0.22 | -0.24 |
| TD252  | -0.21 | -0.36 | -0.30 | -0.15 | -0.15 | -0.40 | -0.14 | -0.21 | -0.22 | -0.24 |
| TD773  | -0.19 | -0.25 | -0.19 | -0.12 | -0.45 | -0.34 | -0.23 | -0.20 | -0.18 | -0.24 |
| TD314  | -0.25 | -0.37 | -0.23 | -0.13 | -0.16 | -0.34 | -0.23 | -0.28 | -0.22 | -0.25 |



|        |       |       |       |       |       |       |       |       |       |       |
|--------|-------|-------|-------|-------|-------|-------|-------|-------|-------|-------|
| TD28   | -0.27 | -0.27 | -0.20 | -0.10 | -0.40 | -0.10 | -0.34 | -0.31 | -0.23 | -0.25 |
| TD21   | -0.24 | -0.49 | -0.29 | -0.16 | -0.26 | -0.27 | -0.11 | -0.24 | -0.22 | -0.25 |
| TD43   | -0.28 | -0.34 | -0.32 | -0.17 | -0.18 | -0.25 | -0.30 | -0.27 | -0.23 | -0.26 |
| TD26   | -0.26 | -0.28 | -0.22 | -0.10 | -0.29 | -0.30 | -0.37 | -0.29 | -0.23 | -0.26 |
| TD124  | -0.30 | -0.44 | -0.19 | -0.11 | -0.21 | -0.08 | -0.41 | -0.34 | -0.25 | -0.26 |
| TD741  | -0.24 | -0.18 | -0.32 | -0.16 | -0.21 | -0.40 | -0.33 | -0.31 | -0.22 | -0.26 |
| TD23   | -0.32 | -0.28 | -0.24 | -0.20 | -0.37 | -0.13 | -0.28 | -0.33 | -0.25 | -0.27 |
| TD72   | -0.28 | -0.42 | -0.26 | -0.14 | -0.29 | -0.39 | -0.23 | -0.19 | -0.22 | -0.27 |
| TRTD17 | -0.19 | -0.55 | -0.24 | -0.16 | -0.35 | -0.37 | -0.13 | -0.24 | -0.22 | -0.27 |
| TD204  | -0.29 | 0.08  | -0.43 | -0.27 | -0.32 | -0.56 | -0.20 | -0.26 | -0.20 | -0.27 |
| TD47   | -0.31 | -0.44 | -0.31 | -0.17 | -0.43 | -0.27 | -0.12 | -0.29 | -0.25 | -0.29 |
| TD50   | -0.31 | -0.26 | -0.24 | -0.15 | -0.48 | -0.28 | -0.31 | -0.32 | -0.25 | -0.29 |
| TD272  | -0.28 | -0.42 | -0.21 | -0.21 | -0.29 | -0.47 | -0.21 | -0.28 | -0.24 | -0.29 |
| TRTD11 | -0.26 | -0.38 | -0.33 | -0.16 | -0.39 | -0.22 | -0.34 | -0.30 | -0.23 | -0.29 |
| TD640  | -0.29 | -0.15 | -0.42 | -0.28 | -0.29 | -0.26 | -0.43 | -0.33 | -0.21 | -0.30 |
| TRTD12 | -0.33 | 0.05  | -0.42 | -0.20 | -0.39 | -0.44 | -0.34 | -0.31 | -0.29 | -0.30 |
| TD774  | -0.30 | -0.37 | -0.40 | -0.17 | -0.25 | -0.43 | -0.24 | -0.29 | -0.24 | -0.30 |
| TD66   | -0.31 | -0.26 | -0.27 | -0.18 | -0.35 | -0.36 | -0.35 | -0.35 | -0.27 | -0.30 |
| TD545  | -0.28 | -0.37 | -0.43 | -0.23 | -0.25 | -0.45 | -0.21 | -0.31 | -0.22 | -0.31 |
| TRTD06 | -0.27 | -0.49 | -0.41 | -0.18 | -0.22 | -0.45 | -0.27 | -0.25 | -0.23 | -0.31 |
| TRTD57 | -0.37 | -0.03 | -0.34 | -0.15 | -0.20 | -0.58 | -0.43 | -0.36 | -0.33 | -0.31 |
| TRTD04 | -0.31 | -0.44 | -0.35 | -0.19 | -0.14 | -0.40 | -0.41 | -0.35 | -0.25 | -0.31 |
| TD410  | -0.29 | -0.42 | -0.42 | -0.18 | -0.55 | -0.30 | -0.19 | -0.25 | -0.24 | -0.32 |
| TD412  | -0.33 | -0.62 | -0.29 | -0.21 | -0.27 | -0.30 | -0.26 | -0.33 | -0.25 | -0.32 |
| TD53   | -0.34 | -0.35 | -0.38 | -0.19 | -0.34 | -0.31 | -0.35 | -0.35 | -0.26 | -0.32 |
| TRTD10 | -0.32 | -0.33 | -0.40 | -0.20 | -0.29 | -0.36 | -0.41 | -0.38 | -0.25 | -0.33 |
| TD118  | -0.33 | -0.38 | -0.34 | -0.20 | -0.42 | -0.39 | -0.30 | -0.33 | -0.26 | -0.33 |
| TD75   | -0.36 | -0.49 | -0.36 | -0.18 | -0.32 | -0.28 | -0.34 | -0.35 | -0.27 | -0.33 |
| TRTD20 | -0.30 | -0.36 | -0.53 | -0.24 | -0.33 | -0.41 | -0.26 | -0.30 | -0.25 | -0.33 |
| TD230  | -0.45 | -0.08 | -0.48 | -0.15 | -0.40 | -0.28 | -0.48 | -0.41 | -0.28 | -0.33 |

|        |       |       |       |       |       |       |       |       |       |       |
|--------|-------|-------|-------|-------|-------|-------|-------|-------|-------|-------|
| TD333  | -0.34 | -0.29 | -0.33 | -0.23 | -0.25 | -0.41 | -0.45 | -0.41 | -0.32 | -0.34 |
| TD69   | -0.38 | -0.45 | -0.32 | -0.20 | -0.27 | -0.36 | -0.38 | -0.39 | -0.28 | -0.34 |
| TD459  | -0.35 | -0.58 | -0.32 | -0.17 | -0.30 | -0.36 | -0.34 | -0.36 | -0.26 | -0.34 |
| TD39   | -0.35 | -0.42 | -0.37 | -0.19 | -0.52 | -0.30 | -0.32 | -0.35 | -0.26 | -0.34 |
| TRTD30 | -0.40 | -0.22 | -0.38 | -0.20 | -0.32 | -0.47 | -0.45 | -0.41 | -0.28 | -0.35 |
| TRTD38 | -0.37 | -0.42 | -0.39 | -0.17 | -0.42 | -0.49 | -0.23 | -0.38 | -0.27 | -0.35 |
| TD211  | -0.41 | -0.24 | -0.49 | -0.20 | -0.16 | -0.47 | -0.46 | -0.43 | -0.29 | -0.35 |
| TD317  | -0.34 | -0.62 | -0.34 | -0.20 | -0.25 | -0.54 | -0.29 | -0.32 | -0.26 | -0.35 |
| TD651  | -0.39 | -0.20 | -0.58 | -0.26 | -0.15 | -0.61 | -0.37 | -0.39 | -0.25 | -0.35 |
| TD58   | -0.40 | -0.45 | -0.38 | -0.18 | -0.49 | -0.31 | -0.36 | -0.39 | -0.28 | -0.36 |
| TD419  | -0.41 | -0.52 | -0.36 | -0.11 | -0.45 | -0.37 | -0.41 | -0.37 | -0.28 | -0.36 |
| TD95   | -0.36 | -0.43 | -0.37 | -0.19 | -0.41 | -0.51 | -0.39 | -0.37 | -0.27 | -0.37 |
| TD268  | -0.41 | -0.52 | -0.37 | -0.22 | -0.23 | -0.52 | -0.42 | -0.41 | -0.28 | -0.38 |
| TD522  | -0.44 | -0.66 | -0.34 | -0.25 | -0.23 | -0.48 | -0.40 | -0.39 | -0.23 | -0.38 |
| TD529  | -0.42 | -0.28 | -0.53 | -0.26 | -0.31 | -0.52 | -0.39 | -0.44 | -0.28 | -0.38 |
| TD45   | -0.48 | -0.21 | -0.55 | -0.23 | -0.41 | -0.46 | -0.37 | -0.44 | -0.31 | -0.38 |
| TD301  | -0.43 | -0.69 | -0.41 | -0.17 | -0.37 | -0.38 | -0.39 | -0.40 | -0.29 | -0.39 |
| TD44   | -0.47 | -0.53 | -0.44 | -0.20 | -0.39 | -0.48 | -0.41 | -0.44 | -0.31 | -0.41 |
| TRTD19 | -0.46 | -0.58 | -0.47 | -0.22 | -0.45 | -0.44 | -0.42 | -0.45 | -0.30 | -0.42 |
| TD310  | -0.50 | -0.53 | -0.46 | -0.21 | -0.50 | -0.35 | -0.45 | -0.48 | -0.32 | -0.42 |
| TD94   | -0.44 | -0.58 | -0.45 | -0.22 | -0.52 | -0.42 | -0.45 | -0.46 | -0.30 | -0.43 |
| TD694  | -0.49 | -0.53 | -0.42 | -0.13 | -0.61 | -0.40 | -0.45 | -0.48 | -0.34 | -0.43 |
| TD98   | -0.40 | -0.61 | -0.47 | -0.23 | -0.48 | -0.56 | -0.41 | -0.40 | -0.29 | -0.43 |
| TRTD27 | -0.47 | -0.68 | -0.46 | -0.21 | -0.46 | -0.58 | -0.28 | -0.43 | -0.31 | -0.43 |
| TD41   | -0.44 | -0.69 | -0.44 | -0.23 | -0.40 | -0.49 | -0.46 | -0.44 | -0.29 | -0.43 |
| TD52   | -0.45 | -0.57 | -0.52 | -0.22 | -0.38 | -0.52 | -0.44 | -0.48 | -0.30 | -0.43 |
| TRTD03 | -0.49 | -0.48 | -0.50 | -0.24 | -0.37 | -0.49 | -0.53 | -0.49 | -0.31 | -0.43 |
| TRTD25 | -0.48 | -0.66 | -0.53 | -0.20 | -0.33 | -0.53 | -0.40 | -0.49 | -0.31 | -0.44 |
| TD429  | -0.45 | -0.54 | -0.61 | -0.27 | -0.29 | -0.55 | -0.51 | -0.47 | -0.24 | -0.44 |
| TD409  | -0.46 | -0.71 | -0.47 | -0.21 | -0.37 | -0.58 | -0.44 | -0.44 | -0.30 | -0.44 |

|        |       |       |       |       |       |       |       |       |       |       |
|--------|-------|-------|-------|-------|-------|-------|-------|-------|-------|-------|
| TD420  | -0.43 | -0.56 | -0.62 | -0.16 | -0.48 | -0.59 | -0.46 | -0.45 | -0.30 | -0.45 |
| TD82   | -0.50 | -0.53 | -0.50 | -0.22 | -0.56 | -0.44 | -0.49 | -0.49 | -0.34 | -0.45 |
| TD14   | -0.51 | -0.51 | -0.54 | -0.23 | -0.44 | -0.43 | -0.55 | -0.55 | -0.33 | -0.46 |
| TD770  | -0.50 | -0.61 | -0.54 | -0.21 | -0.43 | -0.52 | -0.47 | -0.49 | -0.34 | -0.46 |
| TRTD09 | -0.47 | -0.59 | -0.52 | -0.22 | -0.54 | -0.52 | -0.46 | -0.49 | -0.31 | -0.46 |
| TD415  | -0.53 | -0.76 | -0.64 | -0.21 | -0.42 | -0.54 | -0.28 | -0.43 | -0.33 | -0.46 |
| TD540  | -0.53 | -0.33 | -0.64 | -0.21 | -0.50 | -0.68 | -0.46 | -0.50 | -0.31 | -0.46 |
| TD48   | -0.50 | -0.67 | -0.55 | -0.23 | -0.47 | -0.58 | -0.37 | -0.46 | -0.33 | -0.46 |
| TD18   | -0.50 | -0.70 | -0.48 | -0.18 | -0.51 | -0.51 | -0.48 | -0.49 | -0.34 | -0.47 |
| TD398  | -0.52 | -0.44 | -0.57 | -0.25 | -0.46 | -0.54 | -0.56 | -0.56 | -0.35 | -0.47 |
| TD167  | -0.50 | -0.74 | -0.49 | -0.24 | -0.46 | -0.63 | -0.41 | -0.49 | -0.32 | -0.47 |
| TD246  | -0.52 | -0.64 | -0.62 | -0.23 | -0.46 | -0.52 | -0.48 | -0.50 | -0.33 | -0.48 |
| TD513  | -0.43 | -0.68 | -0.56 | -0.28 | -0.57 | -0.54 | -0.49 | -0.47 | -0.32 | -0.48 |
| TD16   | -0.51 | -0.56 | -0.61 | -0.24 | -0.50 | -0.58 | -0.51 | -0.51 | -0.33 | -0.48 |
| TD554  | -0.61 | -0.67 | -0.64 | -0.22 | -0.52 | -0.29 | -0.57 | -0.61 | -0.36 | -0.50 |
| TD422  | -0.56 | -0.68 | -0.56 | -0.23 | -0.49 | -0.55 | -0.52 | -0.58 | -0.34 | -0.50 |
| TD767  | -0.53 | -0.65 | -0.64 | -0.22 | -0.68 | -0.53 | -0.46 | -0.49 | -0.33 | -0.50 |
| TD81   | -0.58 | -0.58 | -0.64 | -0.24 | -0.42 | -0.66 | -0.55 | -0.56 | -0.35 | -0.51 |
| TD427  | -0.51 | -0.63 | -0.65 | -0.29 | -0.43 | -0.62 | -0.58 | -0.55 | -0.33 | -0.51 |
| TD728  | -0.63 | -0.65 | -0.69 | -0.26 | -0.52 | -0.63 | -0.46 | -0.56 | -0.37 | -0.53 |
| TD38   | -0.59 | -0.60 | -0.69 | -0.21 | -0.70 | -0.58 | -0.50 | -0.57 | -0.38 | -0.53 |
| TD440  | -0.59 | -0.73 | -0.62 | -0.24 | -0.58 | -0.62 | -0.56 | -0.56 | -0.33 | -0.54 |
| TRTD42 | -0.41 | -0.76 | -0.53 | -0.20 | -0.71 | -0.66 | -0.66 | -0.60 | -0.38 | -0.54 |
| TD580  | -0.64 | -0.61 | -0.73 | -0.27 | -0.68 | -0.56 | -0.60 | -0.62 | -0.36 | -0.56 |
| TRTD26 | -0.64 | -0.76 | -0.68 | -0.25 | -0.55 | -0.72 | -0.58 | -0.64 | -0.37 | -0.58 |
| TD135  | -0.64 | -0.85 | -0.70 | -0.29 | -0.55 | -0.66 | -0.53 | -0.62 | -0.37 | -0.58 |
| TD544  | -0.67 | -0.80 | -0.76 | -0.30 | -0.53 | -0.66 | -0.50 | -0.64 | -0.37 | -0.58 |
| TD126  | -0.67 | -0.78 | -0.71 | -0.26 | -0.60 | -0.63 | -0.55 | -0.65 | -0.38 | -0.58 |
| TD550  | -0.67 | -0.70 | -0.75 | -0.25 | -0.56 | -0.72 | -0.60 | -0.63 | -0.39 | -0.59 |
| TD430  | -0.66 | -0.60 | -0.76 | -0.28 | -0.58 | -0.75 | -0.60 | -0.67 | -0.38 | -0.59 |

|             |             |             |             |             |             |             |             |             |             |       |
|-------------|-------------|-------------|-------------|-------------|-------------|-------------|-------------|-------------|-------------|-------|
| TD538       | -0.66       | -0.77       | -0.70       | -0.30       | -0.57       | -0.64       | -0.61       | -0.65       | -0.38       | -0.59 |
| TD525       | -0.66       | -0.76       | -0.77       | -0.23       | -0.60       | -0.55       | -0.67       | -0.67       | -0.41       | -0.59 |
| TD96        | -0.70       | -0.58       | -0.80       | -0.28       | -0.65       | -0.73       | -0.58       | -0.66       | -0.40       | -0.60 |
| TD326       | -0.65       | -0.62       | -0.79       | -0.30       | -0.59       | -0.69       | -0.69       | -0.69       | -0.41       | -0.60 |
| TRTD69      | -0.66       | -0.60       | -0.80       | -0.31       | -0.75       | -0.62       | -0.63       | -0.67       | -0.38       | -0.60 |
| TRTD53      | -0.69       | -0.54       | -0.73       | -0.25       | -0.80       | -0.70       | -0.67       | -0.68       | -0.39       | -0.60 |
| TRTD14      | -0.70       | -0.74       | -0.71       | -0.27       | -0.63       | -0.62       | -0.66       | -0.68       | -0.43       | -0.60 |
| TD181       | -0.71       | -0.68       | -0.75       | -0.26       | -0.62       | -0.72       | -0.65       | -0.69       | -0.43       | -0.61 |
| TRTD32      | -0.70       | -0.77       | -0.76       | -0.29       | -0.65       | -0.75       | -0.63       | -0.67       | -0.40       | -0.63 |
| TD570       | -0.74       | -0.81       | -0.76       | -0.30       | -0.74       | -0.75       | -0.65       | -0.70       | -0.43       | -0.65 |
| TRTD66      | -0.79       | -0.70       | -0.85       | -0.29       | -0.85       | -0.78       | -0.70       | -0.76       | -0.45       | -0.68 |
| TD436       | -0.77       | -0.87       | -0.93       | -0.31       | -0.73       | -0.83       | -0.70       | -0.75       | -0.44       | -0.70 |
| TD292       | -0.78       | -0.90       | -0.91       | -0.31       | -0.66       | -0.78       | -0.75       | -0.80       | -0.45       | -0.70 |
| TD10        | -0.84       | -0.74       | -0.96       | -0.32       | -0.79       | -0.83       | -0.71       | -0.81       | -0.45       | -0.72 |
| TRTD51      | -0.86       | -0.96       | -0.95       | -0.32       | -0.81       | -0.84       | -0.75       | -0.82       | -0.47       | -0.75 |
| <b>Mean</b> | <b>0.00</b> |       |
| <b>SD</b>   | <b>1.00</b> |       |

25

## 26 Supplementary Figure

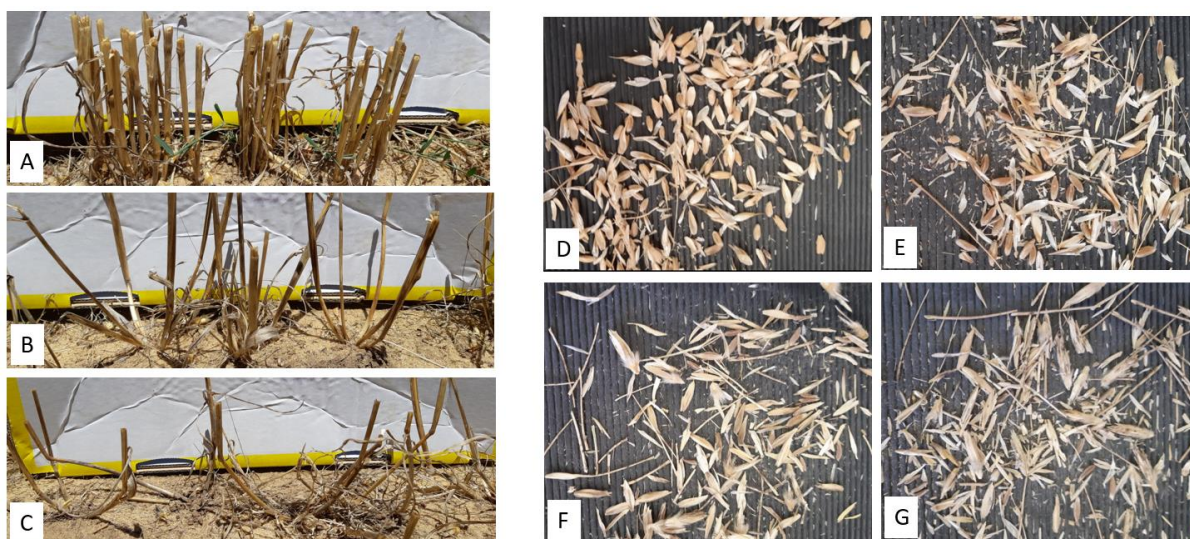

27

28    Supplementary Figure S1: Phenotyping of shoot angle (A, B, and C) and threshing (D, E, F, and G).  
29    Shoot angle means average of angle between effective tillers and soil surface (almost 90° (A), around  
30    45° (B) and close to 0° (C)). Scoring of threshability at a scale of 1 to 4 where 1 = completely free-  
31    threshing with virtually all seed released from the hulls (D), 2 = mostly free-threshing with a minor  
32    portion of the seed remaining hull (E), 3 = somewhat difficult to thresh with a major portion of the seed  
33    remaining hulled (F), and 4 = difficult to thresh with only a few seeds being released from the hulls (G).
